# Supplementary material for: Hybrid Instruments Network Optimization for Air Quality Monitoring
Source: Copernicus journal article supplement (doi:10.5194/amt-2023-173), 2023-09-13
Supplement: Supplementary file [file amt-2023-173-AC2-supplement.pdf]

**Response to Reviewer 2 comments on “Hybrid Instruments Network Optimization for Air Quality Monitoring” (Manuscript AMT-2023-173) submitted to *Atmospheric Measurement Techniques***

**Reviewer 2**

(1) The rationale for the methodology is insufficiently explained.

-The authors do a nice job of explaining their methods, however they don't give a lot of explanation for why they made specific choices. For example, the optimization relies on the satisfaction function "g". The authors assume that "g" increases as a person is placed closer to the nearest monitor, however that assumption is not described or justified in great detail. For example, is it universally true that g increases as distance decreases? For a hybrid network, will people treat both monitors and sensors as equally valuable, and therefore  $g(0) = 1$  for both sensors and monitors?

**Response:** *We appreciate the referee's feedback. We have taken the following steps to address this concern:*

- 1. Clarification of the Satisfaction Function "g": We agree that the assumption regarding the satisfaction function "g" should be better justified. In our revised manuscript, we provide a detailed explanation for the choice of "g" as a function that increases as a person is placed closer to the nearest monitor. Note that people will have higher confidence on the readings by sensors or monitors that are closer to them rather than readings from instruments that are farther from them. The rationale for this assumption is supported by papers such as (Sun et al., 2019)<sup>1</sup>. Please check lines 84-87 of page 3.*
- 2. Hybrid Network Considerations: We recognize that the referee raises a valid point about treating monitors and sensors equally in a hybrid network. We accept that satisfaction should not be the same for sensors and monitors if the accuracy of these instruments is known to the users and our optimization formulation can be modified to consider that. However, in many practical air quality monitoring scenarios, users may*

---

<sup>1</sup> Sun, C., Li, V.O., Lam, J.C. and Leslie, I., 2019. Optimal citizen-centric sensor placement for air quality monitoring: a case study of city of Cambridge, the United Kingdom. *IEEE Access*, 7, pp.47390-47400.

*not be either interested or be able distinguish between data collected from monitors and sensors (if the information related to the type of instrument is not openly available). From the user's perspective, the primary concern may be just to obtain reasonable air quality information, rather than worry about the specific source of the data. That is why, in our case we have only considered the difference of cost between sensors and monitors. In summary, the choice to consider monitors and sensors to be equivalent apart from the cost (and thus  $g(0)=1$  for both the instruments) is rooted in practical considerations, as the users may prioritize air quality information over the source of the data. We have now added this in lines 98-102 on page 4.*

## **Reviewer 2**

If we accept that  $g$  decreases with increasing distance (which seems reasonable), the selection of the exponential decay for  $g(d)$  seems arbitrary. Other functions would fit the rules set by the authors, and they don't explore those as sensitivity cases or explain why an exponential function is the most likely one.

**Response:** *We thank the referee for his comment. The exponential decay function is often chosen in similar studies and practical applications because of its simplicity and effectiveness in modeling the attenuation of signal or influence with increasing distance in studies such as Sun et al. (2019). It aligns with the intuitive idea that the influence of air quality monitoring decreases as one moves farther away from the monitor. We have now added this in lines 94-96 on page 4.*

*We appreciate the referee's suggestion to explore alternative functions as sensitivity cases. As previously mentioned, the  $g(d)$  function should be a decreasing function. Therefore, we explore an alternative function  $g(d) = \frac{1}{d+1}$  apart from the exponential function. We have now obtained the results by greedy algorithm and genetic algorithm for Surat city grid using  $g(d) = \frac{1}{d+1}$ , while by keeping all the other parameters the same. The following figure (put as Fig. 8 in the revised manuscript) shows the results with different functional forms of  $g(d)$ .*

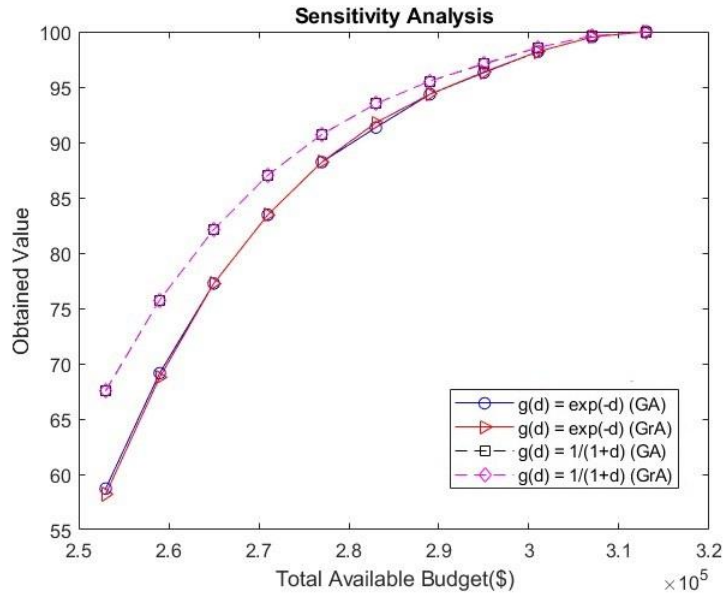

It can be seen in the above figure that the values obtained by the genetic algorithm and the greedy algorithm for  $g(d) = e^{-d}$  are very close and thus the solid blue and red curves almost overlap. The same holds for  $g(d) = \frac{1}{d+1}$  and therefore the dashed black and purple lines almost overlap. Note that the values that are obtained by the two algorithms for  $g(d) = \frac{1}{d+1}$  are greater than that obtained for  $g(d) = e^{-d}$ . That is because  $\frac{1}{d+1} > e^{-d}$  for all positive values of  $d$ . However, notice that the pattern of the values that are obtained for the two functional forms is the same, i.e., the values decrease as the total available budget increases. Also, notice that the values obtained by the two functional forms converge at the budget value of \$313,000. Since it is not possible to have percentage values greater than 100, the values for both the functional forms will remain the same for budget values greater than \$313,000. We believe that similar patterns will be observed by other functional forms of  $g(d)$  as long as they satisfy the conditions that are necessary for satisfaction functions (i.e.,  $g(d)$  must be a strictly decreasing function and  $g(0) = 1$ ). This has now been added in Section 3.1.1.1 on pages 13-14.

## Reviewer2

Overall, the methods are presented well but the rationale is not given. For example, the authors state that they average the fractional population and fractional emissions in each grid. However the basis for this averaging is not given, and it's not clear how this averaging helps the model output (and indeed this averaging is not done for the Mumbai case).

**Response:** We thank the referee for this feedback. The justification for averaging PM2.5 Emissions and Population Density is as follows:

1. *Balancing Priorities:* PM2.5 emissions and population density are two essential factors for air quality sensor placements. By averaging these variables, we strike a balance between the need to monitor areas with high pollution levels (captured by PM2.5 emissions) and areas with high population density (captured by the population density). The above justification has been added in line 262-264 of page 11.
2. *Dimensionality Reduction:* Averaging reduces the dimensionality of the input data, making it more manageable for optimization algorithms. That is, we are able to focus on an optimization problem that has a single objective function due to the averaging process. Had we not done the averaging, and targeted to individually minimize some metrics related to emission and population then it would result into a multi-objective optimization problem which is much more difficult to solve and analyze (Deb, 2001)<sup>2</sup>. This has been added in lines 113-116 of page 4.

Also, averaging is not done for Mumbai due to the absence of PM<sub>2.5</sub> data for Mumbai. However, this is not a limitation of the methodology that we propose and if PM<sub>2.5</sub> emissions data becomes available for Mumbai then we will use the same method as that we used for Surat.

We have also done the sensitivity analysis by changing the weightage between the percentages of population density and PM<sub>2.5</sub> emissions for Surat city (5 km x 5 km area). Greedy algorithm and genetic algorithm are used for this sensitivity analysis by keeping all the parameters same.

#### **Different cases for the weights**

| Case | Weightage for $p_a$ | Weightage for $e_a$ |
|------|---------------------|---------------------|
| 1    | 0.25                | 0.75                |

---

<sup>2</sup> Deb, K., 2011. Multi-objective optimisation using evolutionary algorithms: an introduction. In Multi-objective evolutionary optimisation for product design and manufacturing (pp. 3-34). London: Springer London.

|   |      |      |
|---|------|------|
| 2 | 0.5  | 0.5  |
| 3 | 0.75 | 0.25 |

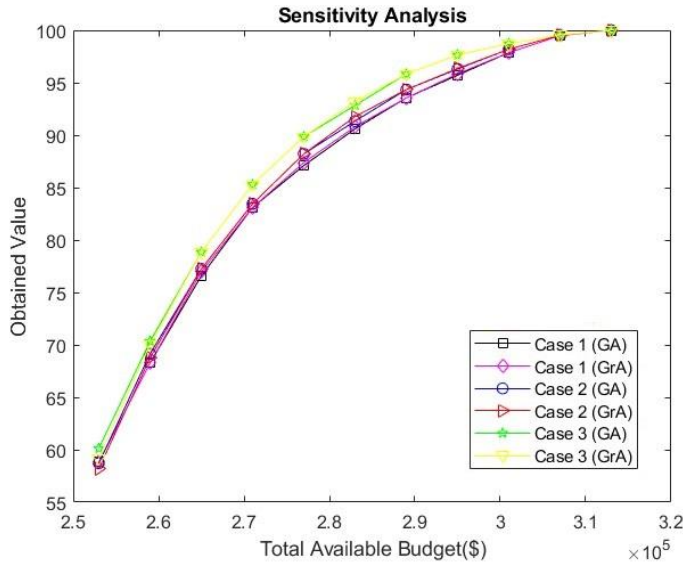

The above figure shows the values that are obtained for different cases, budget values and algorithms. As before, the values obtained by GA and GrA are very close for given weights and budget. Among these cases, the values corresponding to Case 3 (where  $p_a = 0.75$  and  $e_a = 0.25$ ) are the highest and that corresponding to Case 1 (where  $p_a = 0.25$  and  $e_a = 0.75$ ) are the lowest. Thus, as the relative weightage for population density increases in the objective function, the values obtained increases. However, it can be seen that the difference between the values for Cases 1 and 3 is not that large, signifying that the objective function values may not be that sensitive to the relative weightage between population density and emissions. This discussion has now been added in Section 3.1.1.2 of pages 14-15.

## Reviewer 2

Section 2.1 could benefit from some sort of schematic would make this all much easier to follow. A visual representation of what the optimization is trying to do would help readers follow along.

**Response:** We agree that a visual representation can significantly enhance the understanding of the optimization process. To address this suggestion, we will take the following steps in the revised manuscript:

We now provide an example of a 3x3 network (i.e., a network having  $3 \times 3 = 9$  grids) to illustrate the greedy algorithm. The population density data and PM<sub>2.5</sub> emissions data for a 3x3 network are provided below on the left and right, respectively.

|       |       |       |
|-------|-------|-------|
| 65646 | 29660 | 15504 |
| 9487  | 2984  | 2260  |
| 2042  | 2393  | 1711  |

|          |          |          |
|----------|----------|----------|
| 0.143405 | 0.120589 | 0.097773 |
| 0.114025 | 0.142434 | 0.170843 |
| 0.084646 | 0.16428  | 0.243914 |

Then we calculate the percentage of population density ( $p_a$ ) and PM<sub>2.5</sub> emissions ( $e_a$ ) for each grid and then calculate  $m_a$  which is an average of  $p_a$  and  $e_a$ . The following tables show the values of  $p_a$  (left) and  $e_a$  (right).

|        |         |         |
|--------|---------|---------|
| 49.85  | 22.5231 | 11.7734 |
| 7.2042 | 2.266   | 1.7162  |
| 1.5506 | 1.8172  | 1.2993  |

|         |         |         |
|---------|---------|---------|
| 11.1868 | 9.407   | 7.6271  |
| 8.895   | 11.111  | 13.3273 |
| 6.6031  | 12.8153 | 19.0274 |

The following values are the  $m_a$  values for each grid of the 3x3 network that we consider.

|         |        |         |
|---------|--------|---------|
| 30.5184 | 15.965 | 9.7002  |
| 8.0496  | 6.6885 | 7.5217  |
| 4.0769  | 7.3162 | 10.1633 |

Suppose the set  $B$  in which at least one sensor is to be placed from Equation (4) is consists of grids 7 and 9 and set  $C$  in which no monitor can be placed from Equation (5) is given by set 7. Suppose  $h = 2$ , which represents the minimum number of monitors required. Let the cost of sensor ( $c$ ) and monitor ( $c'$ ) be 200 and 8000 units respectively. The total available budget be 16500 units.

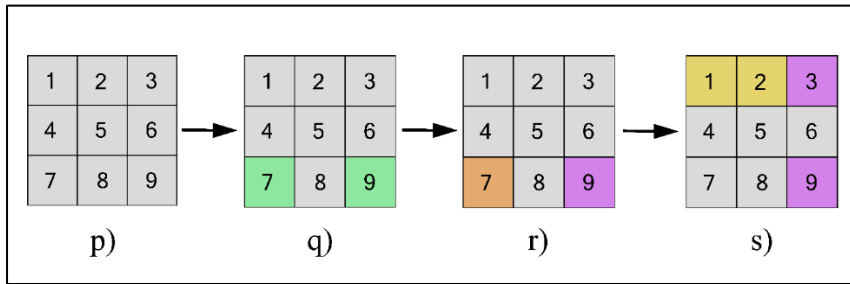

**Fig. 1 Example to show the working of greedy algorithm**

Figure 1p) shows the initial empty grids which are grey in color. Figure 1q) shows the grid area in which two grids (i.e., grids 7 and 9) are shown in light green color grids which tells us about grids in set B, where at least one sensor must be placed. Given that the value of  $m_a$  for grid 9 is greater than that of grid 7, a sensor is initially placed in grid 9 to satisfy Equation (4). The placement of a sensor at grid 9 reduces the available budget to 16300 units.

Figure 1r) shows the placement of sensor at grid 9 and a grid (corresponding to set C) which is shown by orange colored square grid (i.e., grid 7). The monitors are positioned at grid 1 and 2 based on the values obtained from the largest information gain  $s^*$  and in adherence to the Equation (5) which has a requirement that no monitor be placed on any grid belonging to set C. This further reduces the budget from 16300 units to 300 units by subtracting 16000 units (i.e.,  $c'h$ )

We continue to place sensors until the budget constraint is violated. We will place next sensor at the grid with largest information gain  $s^*$  and that grid is grid 3. This further reduces the budget from 300 units to 100 units. The algorithm stops here as there is no sufficient budget to proceed. Figure 1s) shows the final solution using greedy algorithm where grey colored square grids show the empty grids, purple colored square grids shows the placement location of sensors and light yellow colored square grids shows the placement location of monitors.

This example has now been added in pages 7-9.

## Reviewer2

Lastly, the context for the two case studies is not presented very well. For example, Fig 1 shows a map of the predicted sensor locations for Surat. However, we are not provided with any

additional information, such as the population density or the emissions locations, that would help us to understand the results.

**Response:** We appreciate the referee's feedback. We acknowledge the importance of providing a comprehensive understanding of the study context, and thus we are providing the data for population density and PM2.5 emissions that we used.

The total number of grids in Surat are 25 which are numbered from 1 to 25 from left to right in increasing order and from top to bottom in increasing order. This is shown in the figure below and has been added as Figure 2 of the revised manuscript.

|           |           |           |           |           |
|-----------|-----------|-----------|-----------|-----------|
| <b>1</b>  | <b>2</b>  | <b>3</b>  | <b>4</b>  | <b>5</b>  |
| <b>6</b>  | <b>7</b>  | <b>8</b>  | <b>9</b>  | <b>10</b> |
| <b>11</b> | <b>12</b> | <b>13</b> | <b>14</b> | <b>15</b> |
| <b>16</b> | <b>17</b> | <b>18</b> | <b>19</b> | <b>20</b> |
| <b>21</b> | <b>22</b> | <b>23</b> | <b>24</b> | <b>25</b> |

The population density data for Surat network is as follows (in population per sq. km) and has now been added as Figure 3 of the revised manuscript.

|              |              |              |              |              |
|--------------|--------------|--------------|--------------|--------------|
| <b>44252</b> | <b>74524</b> | <b>85060</b> | <b>66989</b> | <b>94922</b> |
| <b>23631</b> | <b>50185</b> | <b>74016</b> | <b>80964</b> | <b>86887</b> |
| <b>40666</b> | <b>69841</b> | <b>65646</b> | <b>29660</b> | <b>15504</b> |
| <b>29549</b> | <b>21068</b> | <b>9487</b>  | <b>2984</b>  | <b>2260</b>  |
| <b>4267</b>  | <b>2293</b>  | <b>2042</b>  | <b>2393</b>  | <b>1711</b>  |

The PM2.5 emissions data for Surat network is as follows (in kT/yr) and has now been added as Figure 4 of the revised manuscript.

|                 |                 |                 |                 |                 |
|-----------------|-----------------|-----------------|-----------------|-----------------|
| <b>0.29385</b>  | <b>0.497288</b> | <b>0.700726</b> | <b>0.665802</b> | <b>0.630877</b> |
| <b>0.199782</b> | <b>0.310924</b> | <b>0.422065</b> | <b>0.393195</b> | <b>0.364325</b> |
| <b>0.105715</b> | <b>0.12456</b>  | <b>0.143405</b> | <b>0.120589</b> | <b>0.097773</b> |
| <b>0.056277</b> | <b>0.085151</b> | <b>0.114025</b> | <b>0.142434</b> | <b>0.170843</b> |
| <b>0.006839</b> | <b>0.045742</b> | <b>0.084646</b> | <b>0.16428</b>  | <b>0.243914</b> |

The link for population data for Mumbai network is now available in the footnote of page 18.



## Reviewer 2

(2) The results are not described in sufficient detail.

Figure 1 looks like each algorithm suggests even spacing. Isn't this basically the null hypothesis? None of the discussion of the results explains how the GA and GrA output differ, or why they reach slightly different network designs. Why does one algorithm place a reference monitor in the extreme southwest of the domain but the other places them both closer to the center?

**Response:** *We appreciate the referee's feedback. The even spacing of monitors and sensors in Figure 5 is not the null hypothesis instead we have assumed that sensors and monitors are placed evenly and in the center of grids for the two case studies that we have considered. However, the optimization formulation does not require the instruments to be evenly spaced. The satisfaction function only depends on the distance  $d$  and thus our formulation will work even if we have unevenly spaced grids. The reason behind the use of square grids in the case studies is that the data that we use on population density and PM<sub>2.5</sub> emissions was collected at a 1 km x 1 km scale. Also, logically it makes sense to place an instrument at the center of a grid. Thus, because of square grids and centers being used for grids, we get even spacing between consecutive potential locations for instruments.*

*The greedy algorithm is based on the principle of making the locally optimal choice at each step with the hope of finding a global optimum. While Greedy Algorithm doesn't guarantee an optimal solution for all problems, it is a very efficient algorithm as it deterministically determines a solution. In contrast, the Genetic Algorithm is a probabilistic algorithm that applies the stochastic operators such as selection, crossover and mutation to improve a set of solutions across different iterations. In Figure 5, the Greedy Algorithm (GrA) places monitors close to each other. That is because after placing one sensor at a grid in set B, the algorithm positions monitors at grids with the highest  $s^*$  values. This leads to monitors being placed close together, as seen at grids 8 and 12. In contrast, the solutions of the Genetic Algorithm are generated through a probabilistic process and thus may exhibit a different spatial distribution than that obtained by the Greedy Algorithm. Note that the objective function value corresponding to both the algorithms for this case is equal to 100 (see Figure 6) but the spatial*

*distribution of the instruments is not the same. That is because this is a discrete optimization problem and it can also be possible that two solutions with very different looking spatial distribution can have the same objective function value. We have added this in lines 255-262 of page 11.*

## **Reviewer 2**

Similarly, the GA and GrA put monitors/sensors in the same locations in Mumbai, with the only difference being the locations of the reference monitors. Again, why is this the only difference?

**Response:** *We thank the referee for this comment. While it may appear that the primary distinction is in the locations of the reference monitors, there are also other differences between the solutions obtained by the two algorithms, as explained next. In the GA results for Mumbai, two sensors are positioned in the northeast area, while no sensors or monitors are placed in that area in GrA. In GrA, monitors/sensors are predominantly concentrated on the left side of the Mumbai area, whereas in GA, the sensors/monitors exhibit a more diverse and scattered distribution. Note that out of 100 grids, sensors and monitors can be placed in only 15 grids by maximizing the objective function. The leftmost and southern areas have the highest population density, which explains the concentration of sensors and monitors in those regions. The above stated paragraph has been added in the manuscript in lines 378-385 of pages 16-17. Note that as mentioned in the previous response, these two algorithms have different characteristics and therefore the solutions obtained by them need not be the same.*

## **Reviewer 2**

Each case study has a specified maximum budget. However, the rationales for these budgets is never stated; they are just presented as part of the results.

**Response:** *We thank the referee for this comment. We have given the rationale on the specific budget values in lines 274-275 of page 11 and have added a sentence in the manuscript which has been show in red font here. It is stated that “The minimum budget that is considered is \$253,000, which is equal to the cost of three sensors plus h monitors (any value of budget lower than this will not yield a feasible solution of the problem as other constraints will not get satisfied). The maximum budget in Figure 2 is \$313,000, which allows for the placement of 2 monitors and 23 sensors, covering the entire portion area (as there are a total of 25 grids) under minimum possible budget as at least 2 monitors need to be placed by Equation (6).”If*

*we keep on increasing the budget, then it might be possible that monitor is increased from 2 to 3 and so on (but that would not yield any increase in the objective function value as satisfaction function is assumed to be identical for sensors and monitors). The previous sentence has been added in lines 278-280 of page 11.*

## **Reviewer 2**

Figure 2, 3, and 5: I think the "value" on the left axis is the value  $g$  used to determine the value of each sensor, but that is not clear. Furthermore, the function  $g$  has values 0-1 inclusive, so why do these plots have a range from ~60-100?

**Response:** *We thank the referee for asking this question. We would like to tell that the obtained value on the left axis in Figure 6, 8, 9, 10 and 12 is the objective function value which is the summation of the products of  $m_a$  and  $g(d)$  over all grid points. The definition of "Obtained Value" has been defined in line 273 of page 11. Therefore, these plots have a range from ~60-100.*

## **Reviewer 2**

Line 195-200 - references on the costs for sensors and monitors would be nice. What types of sensors and monitors are being considered?

**Response:** *We thank the referee for this comment. We obtained the cost estimate for a monitor through the cost of imported continuous ambient air quality monitoring stations (CAAQMS) whose price is available at the following link: <https://timesofindia.indiatimes.com/india/centre-asks-states-not-to-procure-imported-air-quality-monitors-indigenous-systems-to-be-deployed/articleshow/95901936.cms> . Similarly, the cost of a sensor (here Aeroqual S500) is estimated from the following link: <https://www.cleanair.com/product/aeroqual-s500-starter-kit/>. In the revised manuscript, we have included this as a footnote on page 11.*

## **Reviewer 2**

Line 225 - I don't think that the variable  $\theta$  is defined above

**Response:** *We thank the referee for asking this question. We would like to tell that variable  $\theta$  is defined in Section 2.1 Problem statement in lines 94-97 of page 4.*

## **Reviewer 2**

(3) There is a lack of sensitivity and generalizability

-The authors seem to have solved a very narrowly defined problem for two specific cases. While that is fine, they don't discuss how the results of this paper can be used more broadly to inform sensor network design. For example, what about the optimization for Mumbai could be useful to users who are building a network in another location (and perhaps don't have the ability to run this algorithm)?

***Response:** We appreciate the referee's feedback. In response to this comment, we would like to address the following points: Our paper primarily focuses on the optimization of air quality monitoring networks in Surat and Mumbai cities, which are used as illustrative cases. While the study's results are specific to these locations, the underlying methodology and principles learned from these cases can be broadly applied to other areas facing similar air quality monitoring challenges. The methodology presented in our paper serves as a template for optimizing sensor networks in any location, provided that relevant data on population, emissions, and potential grid locations are available. We emphasize in the revised manuscript that the same approach can be adopted by researchers, policymakers, and practitioners in other regions to design effective sensor networks based on local data. The above discussion has been added in the manuscript in lines 421-424 of page 19.*

*We also mention the potential for creating user-friendly software tools or decision support systems based on the methodology presented in our paper. Such tools would enable users with limited algorithmic expertise to apply similar optimization techniques to their specific locations, addressing the concern of not having the ability to run the algorithm. In these software tools, the users will only have to provide input values for the problem like the network they want to solve, costs of instruments, budget, the algorithm they want to use, etc., and the toolbox will provide the results. The above paragraph has been added in lines 447-452 of page 20.*

**Reviewer: 13 General Comments:**

The authors do very little to test the sensitivity of their optimized network. Figure 5 shows how the results change with the number of grids in Mumbai, but they do not seem to probe the results further than that. For example, how does the functional form of "g" impact the results? How does the averaging of population and emissions (or lack thereof) impact the results? How much "better" does an optimal network perform compared to one where all of the sensors cannot be placed exactly at the optimal locations? I think that without probing the output further and providing more information on the broader impact of this work, the paper will have very little impact.

**Response:** *We appreciate the referee's feedback. We provide a more comprehensive analysis in our revised manuscript to address these concerns:*

**Sensitivity Analysis of the Functional Form of "g":** *We conduct a sensitivity analysis to explore how a functional form of  $g(d)$  other than the exponential form impacts the network optimization results. This involves examining the effects of another distance-decay function  $g(d) = \frac{1}{d+1}$  on the performance of the sensor network. We quantify the differences and discuss their implications to provide a clearer understanding of the sensitivity of our model to this function. The sensitivity analysis has been in Section 3.1.1.1.*

**Impact of Averaging Population and Emissions:** *We delve deeper into the impact of averaging population and emissions within grid cells. By comparing the results with scenarios that do not consider equal weights for emissions and population, we now assess how this specific aspect of our methodology affects the optimized network. This sensitivity analysis has been added in Section 3.1.1.2. We have also now better justified the need for computing a weighted average of the percentages of population density and emissions in lines 108-116 of page 4.*

**Performance Comparison with Non-Optimal Sensor Placements:** *We now include a comparative analysis between the performance of different network configurations that have different variations with respect to the optimal solution.*

*Consider an example of 3 x 3 grid. Let the cost of sensor ( $c$ ) and monitor ( $c'$ ) be \$3000 and \$122000 respectively. Suppose the budget value is equal to \$253000. The numbering of the*

grids follows the convention that numbers first increase as we go from left to right in the increasing order and numbers increase as we go from top to bottom. Let the set  $B$  in which at least one sensor is to be placed from Equation (4) consist of grids 7 and 9 and set  $C$  in which no monitor can be placed from Equation (5) be set 7. We consider four different feasible solutions as follows:

*Case 1: Solution obtained from greedy algorithm.*

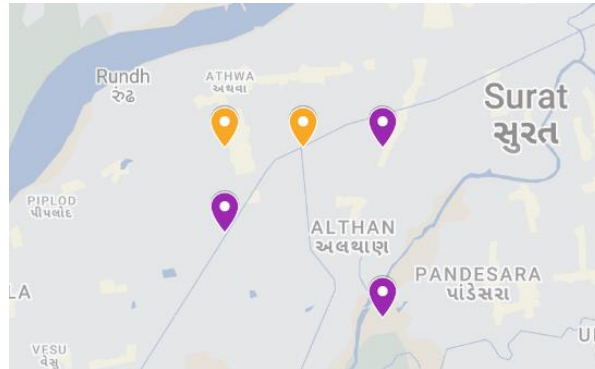

The above figure shows the solution that is obtained in Case 1. The purple points show the placement location of sensors and orange points show the placement location of monitors. It can be seen that monitors are placed at grids 1 and 2 and sensors are placed at grids 3, 4 and 9.

*Case 2: Sensor placed at grid 3 in Case 1 is moved to grid 7 (all the other instrument locations remain the same as in Case 1).*

*Case 3: Monitor placed at grid 1 in Case 1 is moved to grid 5 (all the other instrument locations remain the same as in Case 1).*

*Case 4: When sensor placed at grid 3 in Case 1 is moved to grid 7 and monitor placed at grid 1 in Case 1 is moved to grid 5 (all the other instrument locations remain the same as in Case 1).*

The following table shows the values that are obtained for different cases.

| <b>Case</b> | <b>Obtained Value</b> |
|-------------|-----------------------|
| Case 1      | 83.8154               |
| Case 2      | 80.2608               |

|               |                |
|---------------|----------------|
| <i>Case 3</i> | <i>68.7521</i> |
| <i>Case 4</i> | <i>65.1975</i> |

*It can be seen that Case 1 has the largest value and the values decrease as we go from Case 1 to Case 4. Thus, Case 1 is the closest to the optimal solution and Case 4 is the farthest. Note that Case 4 has both the modifications that are made in Cases 2 and 3 with respect to Case 1. Since there was decrease in the value as we go from Case 1 to Case 2 and from Case 1 to Case 3, the largest decrease is seen as we go from Case 1 to Case 4. The above discussion has been included in lines 292-315 of pages 12-13.*
